# Supplementary material for: Evaluation of Probiotic and Antimicrobial Properties of Patulin-Degrading Latilactobacillus sakei KMP17 and Its Fermentation
Source: MDPI journal article supplement (doi:10.3390/foods15020234), 2026-01-09

# Supporting Materials

## Evaluation of Probiotic and Antimicrobial Properties of Patulin-Degrading *Latilactobacillus sakei* KMP17 and Its Fermentation

Zi-Qi Yang <sup>1</sup>, Xin-Ru Wen <sup>1</sup>, Chun-Zhi Jin <sup>2</sup>, Taihua Li <sup>1</sup>, Feng-Jie Jin <sup>1</sup>, Hyung-Gwan Lee <sup>2,\*</sup> and Long Jin <sup>1,\*</sup>

- <sup>1</sup> Co-Innovation Center for Sustainable Forestry in Southern China, College of Ecology and Environment, Nanjing Forestry University, Nanjing 210037, China  
<sup>2</sup> Cell Factory Research Centre, Korea Research Institute of Bioscience & Biotechnology (KRIBB), Daejeon 34141, Republic of Korea  
\* Correspondence: trustin@kribb.re.kr (H.-G.L.); isacckim@alumni.kaist.ac.kr (L.J.)

**Table S1.** Results of 16SRNA sequence comparison and identification of four LAB strains.

| Strains | Closest taxa                                              | Similarity (%) |
|---------|-----------------------------------------------------------|----------------|
| KM4     | <i>Weissella cibaria</i> KACC 11862 <sup>T</sup>          | 100            |
| KM14    | <i>Weissella cibaria</i> KACC 11862 <sup>T</sup>          | 100            |
| KMP17   | <i>Latilactobacillus sakei</i> DSM 20017 <sup>T</sup>     | 100            |
| KM35    | <i>Leuconostoc mesenteroides</i> Wikim SH006 <sup>T</sup> | 100            |

**Table S2.** Antibiotic sensitivity test of the strains.

| Antibiotics | Strain ID |      |       |      |
|-------------|-----------|------|-------|------|
|             | KM4       | KM14 | KMP17 | KM35 |
| SAM         | S         | S    | S     | S    |
| SH          | I         | R    | I     | I    |
| LM          | I         | I    | I     | S    |
| NA          | R         | R    | R     | R    |
| TCY         | S         | S    | S     | S    |
| AMK         | I         | I    | R     | I    |
| KAN         | R         | R    | R     | I    |
| VAN         | R         | R    | R     | R    |
| CHL         | I         | I    | S     | I    |
| ERY         | S         | S    | S     | S    |
| STR         | R         | R    | R     | I    |
| RIF         | I         | I    | S     | S    |
| GEM         | I         | I    | R     | I    |
| TEC         | R         | R    | I     | R    |

*Note.* R = Resistant, I = Intermediate, S = Susceptible.

**Table S3.** Results of CARD annotations of *L. sakei* KMP17.

| Gene ID  | AMR Gene    | Antibiotic Resistance                    | Resistance Mechanism                                | Identity (%) |
|----------|-------------|------------------------------------------|-----------------------------------------------------|--------------|
| gene1140 | <i>tuf</i>  | Elfamycin antibiotic                     | Alteration of antibiotic target                     | 74.7         |
| gene1443 | <i>liaR</i> | Peptide antibiotic                       | Antibiotic efflux, alteration of antibiotic target  | 75.6         |
| gene1845 | <i>fusA</i> | Fusidane antibiotic                      | Alteration of antibiotic target                     | 72.0         |
| gene1851 | <i>rpoB</i> | Peptide antibiotic, rifamycin antibiotic | Alteration of antibiotic target, target replacement | 72.0         |

*Note.* Identity (%): Sequence identity, the percentage of completely identical regions between two sequences. Score: Alignment score, where a higher value indicates higher homology between the two sequences.

**Table S4.** Results of VF-related gene in the genomes of *L. sakei* KMP17.

| Gene ID  | Virulence Factor Name            | VFDB Accession | Identity (%) |
|----------|----------------------------------|----------------|--------------|
| gene0599 | ClpP (VF0074)                    | VFG000077      | 72.3         |
| gene1576 | Hyaluronic acid capsule (VF0244) | VFG000964      | 70.1         |

Figure S1. Standard curve of patulin concentration by HPLC.

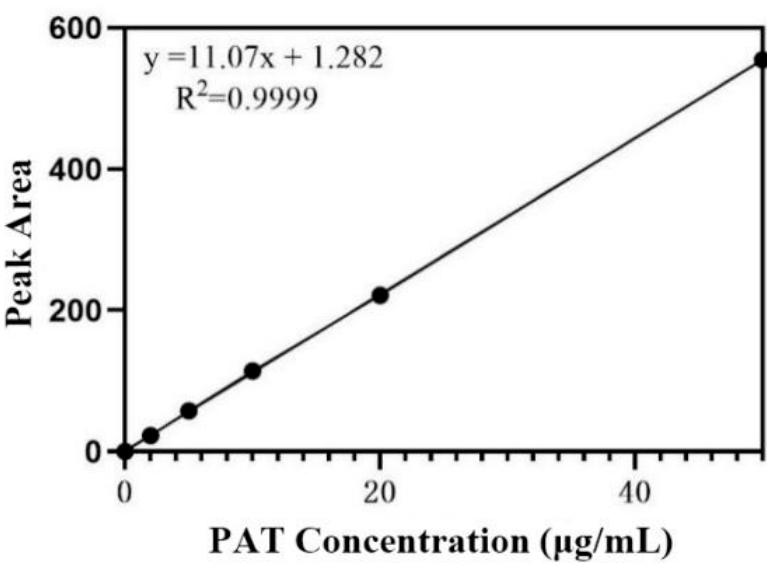

**Figure S2.** Phylogenetic tree based on 16S rRNA gene sequences using the neighbor-joining method showing the position of KMP17 among the related taxa. The bootstrap percentages are based on 1000 replications; only values over 50 % are shown. Bar, 0.5 substitution per 100 nt positions.

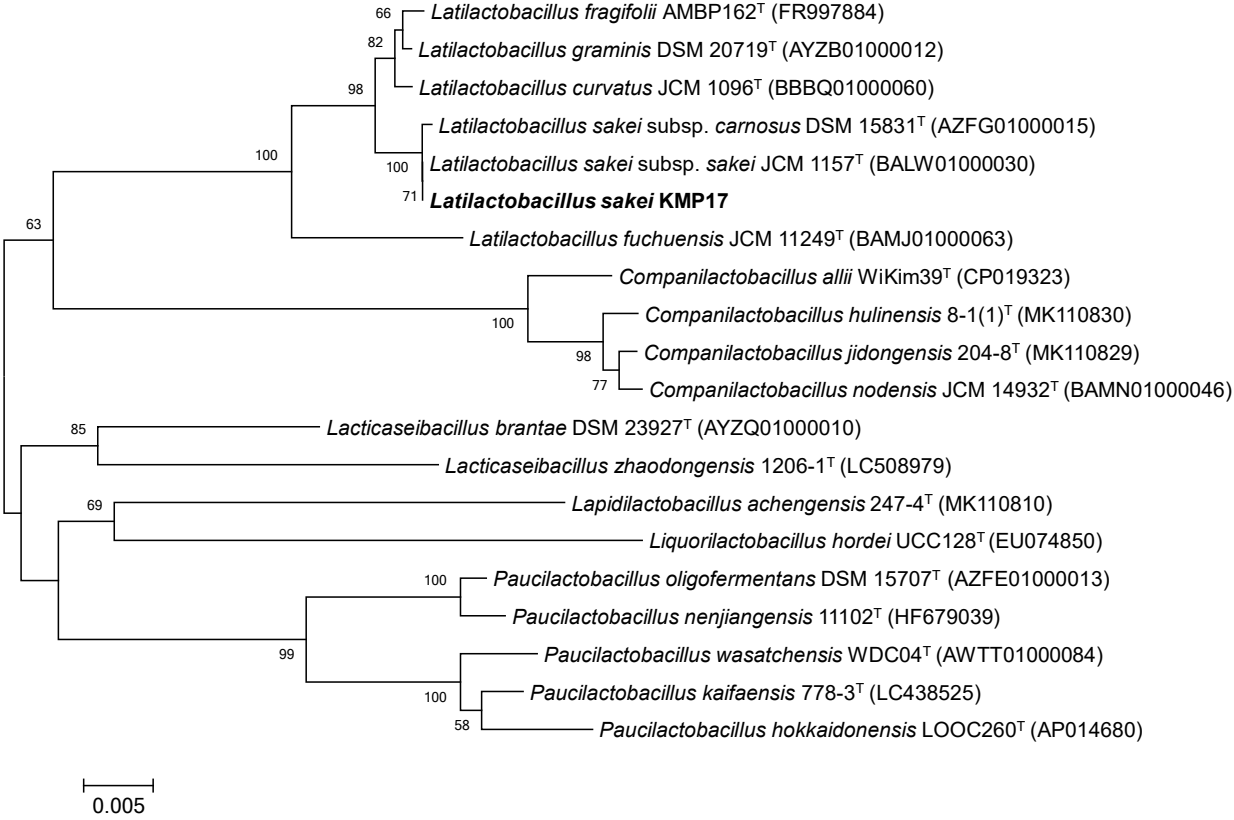

**Figure S3.** Hemolytic activity evaluation of four LAB strains was assessed using Columbia agar containing 5% (w/v) sheep blood for 48h at 30 °C. *L. sakei* KM-17 colonies exhibited no hemolysis, whereas *Staphylococcus aureus* ATCC 25923 colonies showed clear lysis of blood cells. *S. aureus* ATCC 25923 (a); is *W. cibaria* KM-4 (b); is *W. cibaria* KM-14 (c); is *L. sakei* KM-17 (d); is *L. mesenteroides* KM-35 (e).

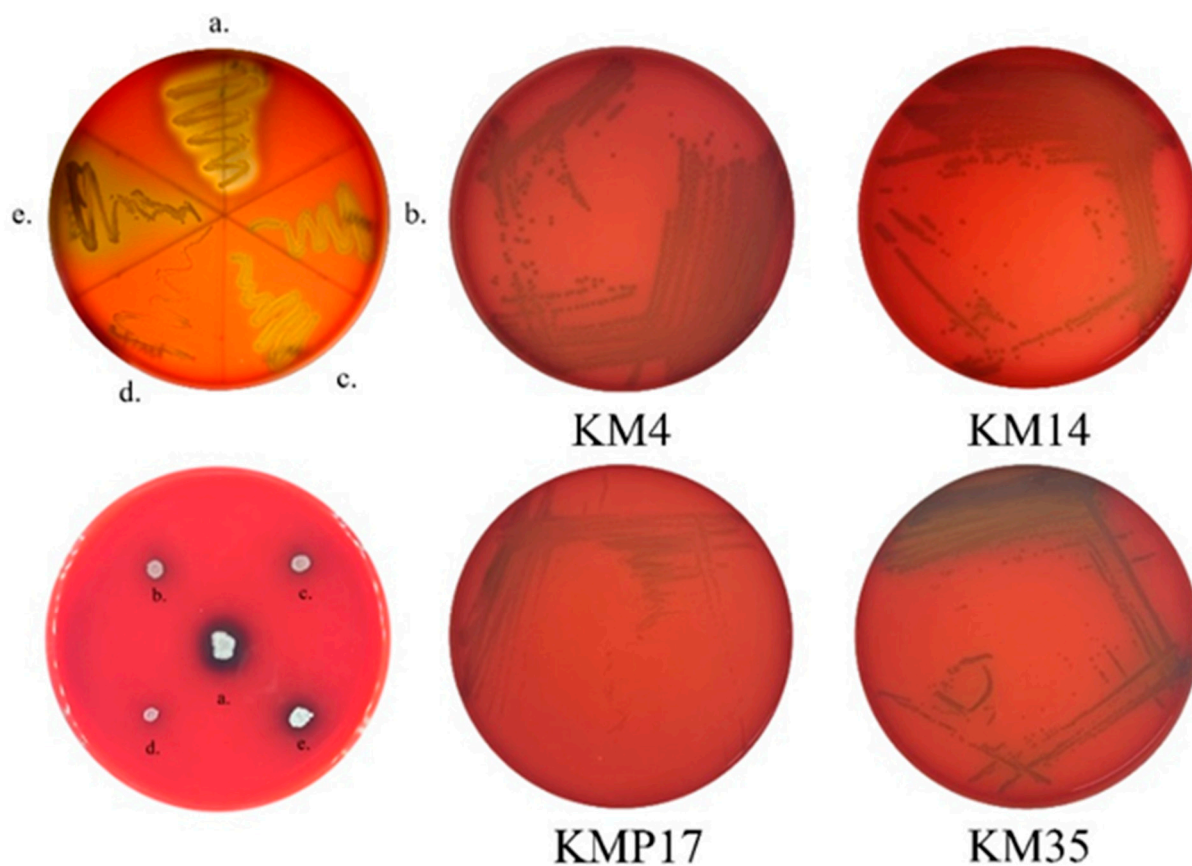

**Figure S4.** Degradation rates of PAT by four LAB strains.

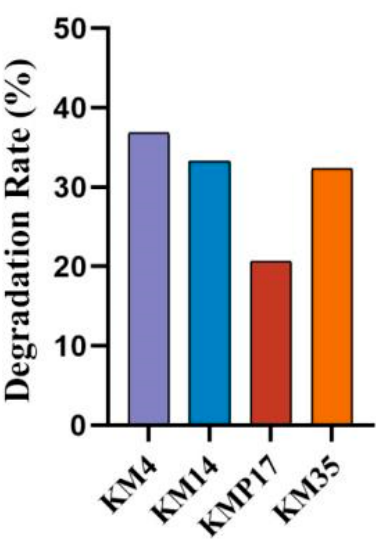

Supplement: s1 [file foods-4013634-supplementary.pdf › foods-4013634-supplementary.pdf]
